# Supplementary material for: Effectiveness and Safety of SARS-CoV-2 Vaccines among Children and Adolescents: A Systematic Review and Meta-Analysis
Source: MDPI journal article supplement (doi:10.3390/vaccines10030421), 2022-03-10
Supplement: s1 [file s1]

Table S1. Search strategy

| Databases | Detailed search strategy                                                                                                                                                                                                                                                                                                                                                                                                                                                                                                                                                                                                                                                                                                                                                                                                                                                                                                                                                                                                                                                                                                                                                                                                                                                                                                                                               |
|-----------|------------------------------------------------------------------------------------------------------------------------------------------------------------------------------------------------------------------------------------------------------------------------------------------------------------------------------------------------------------------------------------------------------------------------------------------------------------------------------------------------------------------------------------------------------------------------------------------------------------------------------------------------------------------------------------------------------------------------------------------------------------------------------------------------------------------------------------------------------------------------------------------------------------------------------------------------------------------------------------------------------------------------------------------------------------------------------------------------------------------------------------------------------------------------------------------------------------------------------------------------------------------------------------------------------------------------------------------------------------------------|
| Pubmed    | <p> ((((Vaccines[MeSH Terms]) OR (Vaccination[MeSH Terms]) OR<br/> (Vaccine[Title/Abstract]) OR (Vaccination[Title/Abstract]) OR (Active<br/> Immunization[Title/Abstract])) AND ((COVID-19[MeSH Terms]) OR<br/> (SARS-CoV-2[MeSH Terms]) OR (COVID-19[Title/Abstract]) OR (SARS-<br/> CoV-2[Title/Abstract]) OR (2019 novel coronavirus[Title/Abstract]) OR<br/> (2019 novel coronaviruses[Title/Abstract]) OR (COVID19[Title/Abstract])<br/> OR (2019-nCoV[Title/Abstract]) OR (coronavirus disease<br/> 2019[Title/Abstract]) OR (coronavirus disease 2019 virus[Title/Abstract])<br/> OR (SARS Coronavirus 2[Title/Abstract]) OR (Coronavirus Disease-<br/> 19[Title/Abstract]) OR (SARS CoV 2 Virus[Title/Abstract]))) AND<br/> ((Child[MeSH Terms]) OR (Infant[MeSH Terms]) OR (Adolescent[MeSH<br/> Terms]) OR (Child[Title/Abstract]) OR (Children[Title/Abstract]) OR<br/> (Childhood[Title/Abstract]) OR (Infant[Title/Abstract]) OR<br/> (Adolescent[Title/Abstract]) OR (Adolescence[Title/Abstract]) OR<br/> (Teenager[Title/Abstract]) OR (Youth[Title/Abstract]))) AND<br/> ((Safety[MeSH Terms]) OR (Drug-Related Side Effects and Adverse<br/> Reactions[MeSH Terms]) OR (safety[Title/Abstract]) OR<br/> (effectiveness[Title/Abstract]) OR (safe[Title/Abstract]) OR<br/> (safeties[Title/Abstract]) OR (efficacy[Title/Abstract]) OR (adverse </p> |

|                |                                                                                                                                                                                                                                                                                                                                                                                                                                                                                                                                                                                                                                                                                                                                                                                                                                                                                                                                                                                                 |
|----------------|-------------------------------------------------------------------------------------------------------------------------------------------------------------------------------------------------------------------------------------------------------------------------------------------------------------------------------------------------------------------------------------------------------------------------------------------------------------------------------------------------------------------------------------------------------------------------------------------------------------------------------------------------------------------------------------------------------------------------------------------------------------------------------------------------------------------------------------------------------------------------------------------------------------------------------------------------------------------------------------------------|
|                | effect[Title/Abstract]) OR (adverse event[Title/Abstract]) OR (side effect[Title/Abstract]) OR (tolerability[Title/Abstract]))                                                                                                                                                                                                                                                                                                                                                                                                                                                                                                                                                                                                                                                                                                                                                                                                                                                                  |
| Embase         | (((('vaccine'/exp) OR ('vaccination'/exp) OR (('vaccine' OR 'vaccination' OR 'active immunization'):ab,ti)) AND (('coronavirus disease 2019'/exp) OR ('Severe acute respiratory syndrome coronavirus 2'/exp) OR (('COVID-19' OR 'SARS-CoV-2' OR '2019 novel coronavirus' OR '2019 novel coronaviruses' OR 'COVID19' OR '2019-nCoV' OR 'coronavirus disease 2019' OR 'SARS Coronavirus 2' OR 'Coronavirus Disease-19' OR 'SARS CoV 2 Virus'):ab,ti))) AND (('child'/exp) OR ('adolescent'/exp) OR ('child'/exp) OR ('juvenile'/exp) OR (('child' OR 'infant' OR 'adolescent' OR 'juvenile' OR 'children' OR 'childhood' OR 'adolescence' OR 'adolescent' OR 'teenager' OR 'youth'):ab,ti)) AND (('safety'/exp) OR ('adverse event'/exp) OR ('side effect'/exp) OR (('safety' OR 'Drug-Related Side Effects and Adverse Reactions' OR 'effectiveness' OR 'safe' OR 'safeties' OR 'effectiveness' OR 'efficacy' OR 'adverse effect' OR 'adverse event' OR 'side effect' OR 'tolerability'):ab,ti)) |
| Wed of science | TS=((vaccine OR vaccination OR "active immunization" OR "active immunizations") AND ("COVID-19" OR "SARS-CoV-2" OR "2019 novel coronavirus" OR "2019 novel coronavirus" OR COVID19 OR "2019-nCoV" OR "coronavirus disease 2019" OR "SARS Coronavirus 2" OR "Coronavirus Disease-19" OR "SARS CoV 2 Virus" OR "Severe acute respiratory syndrome coronavirus 2")) AND (child OR infant OR juvenile OR                                                                                                                                                                                                                                                                                                                                                                                                                                                                                                                                                                                            |

|  |                                                                                                                                                                                                                                                                             |
|--|-----------------------------------------------------------------------------------------------------------------------------------------------------------------------------------------------------------------------------------------------------------------------------|
|  | <p>children OR childhood OR adolescence OR adolescent OR teenager OR youth) AND (safety OR “Drug-Related Side Effects and Adverse Reactions” OR effectiveness OR safe OR safeties OR efficacy OR “adverse effect” OR “adverse event” OR “side effect” OR tolerability))</p> |
|--|-----------------------------------------------------------------------------------------------------------------------------------------------------------------------------------------------------------------------------------------------------------------------------|

Table S2. Articles for analysis of effectiveness

| First author           | Publication time | Study design  | Country of population | Kinds of SARS-CoV-2 vaccine | Vaccination status     | Age of population (years old) | Vaccinated people with SARA-CoV-2 infection (n/N) | Unvaccinated people with SARA-CoV-2 infection (n/N) | Vaccinated people with COVID-19 (n/N) | Unvaccinated people with COVID-19 (n/N) |
|------------------------|------------------|---------------|-----------------------|-----------------------------|------------------------|-------------------------------|---------------------------------------------------|-----------------------------------------------------|---------------------------------------|-----------------------------------------|
| Sara Y Tartof          | 2021.10          | cohort study  | USA                   | BNT162b2                    | 1 dose (<14days)       | 12-15                         | 24/7164                                           | 8425/104918                                         |                                       |                                         |
|                        |                  |               |                       |                             | 2 dose ( $\geq$ 7days) | 12-15                         | 59/78843                                          | 8425/104918                                         |                                       |                                         |
| Kashif Ali             | 2021.8           | RCT Phase 2-3 | USA                   | mRNA-1273 vaccine           | 1 dose (>14days)       | 12-17                         | 27/2163                                           | 42/1073                                             | 2/2163                                | 13/1073                                 |
|                        |                  |               |                       |                             | 2 dose (1>4days)       | 12-17                         | 22/2139                                           | 23/1024                                             | 1/2139                                | 7/1042                                  |
| Robert W. Freneck, Jr. | 2021.5           | RCT Phase 3   | multinational         | BNT162b2                    | 1 dose (<21days)       | 12-15                         |                                                   |                                                     | 3/1131                                | 12/1129                                 |

|                  |         |                  |               |          |                                 |       |       |        |         |
|------------------|---------|------------------|---------------|----------|---------------------------------|-------|-------|--------|---------|
|                  |         |                  |               |          | 2 dose (<7days)                 | 12-15 |       | 0/1131 | 5/1129  |
|                  |         |                  |               |          | 2 dose (>7days and<br><4months) | 12-15 |       | 0/1131 | 18/1129 |
| E.B. Walter      | 2021.11 | RCT Phase<br>2-3 | USA           | BNT162b2 | 2 dose (>7days)                 | 5-11  |       | 3/1045 | 16/736  |
| Karen<br>Lutrick | 2021.12 | cohort<br>study  | USA           | BNT162b2 | 2 dose (≥14days)                | 12-17 | 5/190 | 16/66  |         |
| S.J. Thomas      | 2021.9  | RCT Phase<br>2-3 | multinational | BNT162b2 | 1 dose (≥7days)                 | 16-17 |       | 3/373  | 19/370  |
|                  |         |                  |               |          | 2 dose (≥7days)                 | 16-17 |       | 0/342  | 10/331  |

Table S3. Articles for analysis of safety

| First author  | Publication time | Study design          | Country of population | Kinds of SARS-CoV-2 vaccine | Vaccination status | Dosage | Age        |                 | Adverse events |          |           |          |          |                     |                               |       |       |          |        |         |       |          |          |         |          |         |          |                        |            |                |                          |                             |  |
|---------------|------------------|-----------------------|-----------------------|-----------------------------|--------------------|--------|------------|-----------------|----------------|----------|-----------|----------|----------|---------------------|-------------------------------|-------|-------|----------|--------|---------|-------|----------|----------|---------|----------|---------|----------|------------------------|------------|----------------|--------------------------|-----------------------------|--|
|               |                  |                       |                       |                             |                    |        | Population | Sample size (N) | Nausea         | Vomiting | Diarrhoea | Anorexia | Headache | Injection site pain | Myalgia/Arthralgia/Joint pain | Fever | Cough | Dyspnoea | Chills | Fatigue | Rash  | Axillary |          |         |          |         |          |                        |            |                |                          | Any                         |  |
|               |                  |                       |                       |                             |                    |        |            |                 |                |          |           |          |          |                     |                               |       |       |          |        |         |       | Swell    | Sweating | Itching | Pruritus | Redness | Erythema | Mucocutaneous eruption | Induration | Abdominal pain | Any local adverse events | Any systemic adverse events |  |
|               |                  |                       |                       |                             |                    |        |            |                 |                |          |           |          |          |                     |                               |       |       |          |        |         |       |          |          |         |          |         |          |                        |            |                |                          |                             |  |
| Anne M. Hause | 2021.8           | cross-sectional study | USA                   | BNT162b2                    | 1 dose (≤7days)    |        | 12-15      | 62709           | 4703           | 627      | 1944      |          | 1580     | 3837                | 1342                          |       | 3951  | 5832     |        | 4264    | 17182 | 753      | 4703     |         | 3637     |         | 2571     |                        | 2571       | 40071          | 30665                    |                             |  |
|               |                  |                       |                       |                             | 1 dose (≤7days)    |        | 16-17      | 66350           | 6768           | 730      | 2787      |          | 1977     | 3994                | 1685                          |       | 5242  | 6569     |        | 5507    | 22625 | 796      | 5109     |         | 3782     |         | 2256     |                        | 3118       | 41601          | 36957                    |                             |  |
|               |                  |                       |                       |                             | 2 dose (≤7days)    |        | 12-15      | 38817           | 5745           | 1009     | 1281      |          | 1696     | 2325                | 1218                          |       | 4813  |          | 8190   | 17312   | 467   | 3455     |          | 2135    |          | 2057    |          | 2717                   | 24222      | 24610          |                          |                             |  |
|               |                  |                       |                       |                             | 2 dose (≤7days)    |        | 16-17      | 41040           | 8126           | 944      | 2011      |          | 2076     | 2544                | 1670                          |       | 7469  |          | 10752  | 21464   | 451   | 4063     |          | 2586    |          | 2011    |          | 3488                   | 26430      | 28687          |                          |                             |  |
| Kashif Ali    | 2021.8           | RCT Phase 2-3         | USA                   | mRNA-vaccine                | 1 dose (≤7days)    |        | 12-17      | 2482            |                |          |           |          | 1106     |                     | 668                           | 371   | 63    |          | 456    | 1188    |       |          |          |         |          |         | 334      |                        | 2339       | 1701           | 2381                     |                             |  |
|               |                  |                       |                       |                             | 1 dose (>7days)    |        | 12-17      | 2482            |                |          |           |          | 20       |                     | 480                           | 480   | )     | )        |        | 80      | 81    |          |          |         |          | 15      |          | 18                     | 127        | 160            |                          |                             |  |

[illegible]

|        |       |     |                 |                  |      |    |   |   |   |    |   |   |   |   |    |   |  |   |  |
|--------|-------|-----|-----------------|------------------|------|----|---|---|---|----|---|---|---|---|----|---|--|---|--|
| Walter | Phase | 2b2 | (≤7days) in the | dose and 2 dose  |      |    |   |   |   |    |   |   |   |   |    |   |  |   |  |
|        | 2-3   |     | phase 1 study   | with low dose    |      |    |   |   |   |    |   |   |   |   |    |   |  |   |  |
|        |       |     | 1 dose          | 1 dose with      |      |    |   |   |   |    |   |   |   |   |    |   |  |   |  |
|        |       |     | (≤7days) in the | medium dose and  | 5-11 | 16 | 1 | 1 | 5 | 15 | 4 | 1 | 1 | 4 | 11 | 1 |  | 0 |  |
|        |       |     | phase 1 study   | 2 dose with      |      |    |   |   |   |    |   |   |   |   |    |   |  |   |  |
|        |       |     |                 | medium dose      |      |    |   |   |   |    |   |   |   |   |    |   |  |   |  |
|        |       |     | 1 dose          | 1 dose with high |      |    |   |   |   |    |   |   |   |   |    |   |  |   |  |
|        |       |     | (≤7days) in the | dose and 2 dose  | 5-11 | 4  | 0 | 0 | 3 | 4  | 4 | 1 | 0 | 2 | 4  | 2 |  | 4 |  |
|        |       |     | phase 1 study   | with high dose   |      |    |   |   |   |    |   |   |   |   |    |   |  |   |  |
|        |       |     | 1 dose          | 1 dose with high |      |    |   |   |   |    |   |   |   |   |    |   |  |   |  |
|        |       |     | (≤7days) in the | dose and 2 dose  | 5-11 | 12 | 1 | 0 | 4 | 10 | 0 | 1 | 4 | 2 | 6  | 1 |  | 2 |  |
|        |       |     | phase 1 study   | with low dose    |      |    |   |   |   |    |   |   |   |   |    |   |  |   |  |
|        |       |     | 2 dose          | 1 dose with low  |      |    |   |   |   |    |   |   |   |   |    |   |  |   |  |
|        |       |     | (≤7days) in the | dose and 2 dose  | 5-11 | 16 | 0 | 1 | 8 | 14 | 0 | 0 | 2 | 5 | 11 | 5 |  | 6 |  |
|        |       |     | phase 1 study   | with low dose    |      |    |   |   |   |    |   |   |   |   |    |   |  |   |  |
|        |       |     | 2 dose          | 1 dose with      |      |    |   |   |   |    |   |   |   |   |    |   |  |   |  |
|        |       |     | (≤7days) in the | medium dose and  | 5-11 | 16 | 0 | 0 | 9 | 12 | 3 | 0 | 3 | 7 | 10 | 3 |  | 3 |  |
|        |       |     | phase 1 study   | 2 dose with      |      |    |   |   |   |    |   |   |   |   |    |   |  |   |  |
|        |       |     |                 | medium dose      |      |    |   |   |   |    |   |   |   |   |    |   |  |   |  |
|        |       |     | 2 dose          | 1 dose with high |      |    |   |   |   |    |   |   |   |   |    |   |  |   |  |
|        |       |     | (≤7days) in the | dose and 2 dose  | 5-11 | 4  | 1 | 2 | 3 | 4  | 2 | 1 | 4 | 3 | 4  | 2 |  | 3 |  |

|             |        |                 |       |            |                 |                  |      |      |    |    |     |     |     |    |    |     |     |     |                           |
|-------------|--------|-----------------|-------|------------|-----------------|------------------|------|------|----|----|-----|-----|-----|----|----|-----|-----|-----|---------------------------|
| ShengLi Xia | 2021.9 | RCT<br>Phase1-2 | China | BBIBP-CorV | phase 1 study   | with high dose   |      |      |    |    |     |     |     |    |    |     |     |     |                           |
|             |        |                 |       |            | 2 dose          | 1 dose with high |      |      |    |    |     |     |     |    |    |     |     |     |                           |
|             |        |                 |       |            | (≤7days) in the | dose and 2 dose  | 5-11 | 12   | 1  | 0  | 4   | 11  | 1   | 0  | 0  | 4   | 9   | 0   | 2                         |
|             |        |                 |       |            | phase 1 study   | with low dose    |      |      |    |    |     |     |     |    |    |     |     |     |                           |
|             |        |                 |       |            | 1 dose          |                  |      |      |    |    |     |     |     |    |    |     |     |     |                           |
|             |        |                 |       |            | (≤7days) in the |                  |      |      |    |    |     |     |     |    |    |     |     |     |                           |
|             |        |                 |       |            |                 | low dose         | 5-11 | 1511 | 26 | 85 | 359 | 915 | 133 | 60 | 29 | 77  | 501 | 125 | 176                       |
|             |        |                 |       |            | phase 2-3       |                  |      |      |    |    |     |     |     |    |    |     |     |     |                           |
|             |        |                 |       |            | study           |                  |      |      |    |    |     |     |     |    |    |     |     |     |                           |
|             |        |                 |       |            | 2 dose          |                  |      |      |    |    |     |     |     |    |    |     |     |     |                           |
| ShengLi Xia | 2021.9 | RCT<br>Phase1-2 | China | BBIBP-CorV | (≤7days) in the |                  |      |      |    |    |     |     |     |    |    |     |     |     |                           |
|             |        |                 |       |            |                 | low dose         | 5-11 | 1501 | 17 | 88 | 379 | 849 | 155 | 73 | 79 | 131 | 527 | 164 | 211                       |
|             |        |                 |       |            | phase 2-3       |                  |      |      |    |    |     |     |     |    |    |     |     |     |                           |
|             |        |                 |       |            | study           |                  |      |      |    |    |     |     |     |    |    |     |     |     |                           |
|             |        |                 |       |            | 1 dose          |                  |      |      |    |    |     |     |     |    |    |     |     |     |                           |
|             |        |                 |       |            |                 | low dose         | 3-5  | 83   | 0  | 0  | 1   | 0   |     | 4  | 5  | 0   | 0   | 0   | 0                         |
|             |        |                 |       |            | (≤7days)        |                  |      |      |    |    |     |     |     |    |    |     |     |     | 10 (≤30days after 1 dose) |
|             |        |                 |       |            | 1 dose          |                  |      |      |    |    |     |     |     |    |    |     |     |     |                           |
|             |        |                 |       |            |                 | medium dose      | 3-5  | 84   | 1  | 1  | 0   | 3   |     | 7  | 5  | 0   | 0   | 0   | 18 (≤30days after 1 dose) |
|             |        |                 |       |            | (≤7days)        |                  |      |      |    |    |     |     |     |    |    |     |     |     |                           |
| ShengLi Xia | 2021.9 | RCT<br>Phase1-2 | China | BBIBP-CorV | 1 dose          |                  |      |      |    |    |     |     |     |    |    |     |     |     |                           |
|             |        |                 |       |            |                 | high dose        | 3-5  | 84   | 0  | 0  | 2   | 3   |     | 11 | 2  | 1   | 0   | 1   | 20 (≤30days after 1 dose) |
|             |        |                 |       |            | (≤7days)        |                  |      |      |    |    |     |     |     |    |    |     |     |     |                           |
|             |        |                 |       |            | 1 dose          |                  |      |      |    |    |     |     |     |    |    |     |     |     |                           |
|             |        |                 |       |            |                 | low dose         | 6-12 | 84   | 0  | 1  |     | 2   |     | 1  | 1  |     | 0   | 0   | 5 (≤30days after 1 dose)  |
|             |        |                 |       |            | (≤7days)        |                  |      |      |    |    |     |     |     |    |    |     |     |     |                           |
|             |        |                 |       |            |                 |                  |      |      |    |    |     |     |     |    |    |     |     |     |                           |
|             |        |                 |       |            |                 |                  |      |      |    |    |     |     |     |    |    |     |     |     |                           |
|             |        |                 |       |            |                 |                  |      |      |    |    |     |     |     |    |    |     |     |     |                           |
|             |        |                 |       |            |                 |                  |      |      |    |    |     |     |     |    |    |     |     |     |                           |

|  |          |             |       |    |   |   |   |  |   |   |   |   |   |   |   |   |   |   |               |
|--|----------|-------------|-------|----|---|---|---|--|---|---|---|---|---|---|---|---|---|---|---------------|
|  | 1 dose   |             |       |    |   |   |   |  |   |   |   |   |   |   |   |   |   |   | 11 (≤30days   |
|  |          | medium dose | 6-12  | 84 |   | 0 | 0 |  | 5 |   | 1 | 1 |   |   | 2 |   | 1 | 8 | 3             |
|  | (≤7days) |             |       |    |   |   |   |  |   |   |   |   |   |   |   |   |   |   | after 1 dose) |
|  | 1 dose   |             |       |    |   |   |   |  |   |   |   |   |   |   |   |   |   |   | 15 (≤30days   |
|  |          | high dose   | 6-12  | 84 |   | 2 | 0 |  | 4 |   | 6 | 2 |   |   | 0 |   | 0 | 4 | 10            |
|  | (≤7days) |             |       |    |   |   |   |  |   |   |   |   |   |   |   |   |   |   | after 1 dose) |
|  | 1 dose   |             |       |    |   |   |   |  |   |   |   |   |   |   |   |   |   |   | 24 (≤30days   |
|  |          | low dose    | 13-17 | 84 | 2 | 2 | 0 |  | 1 | 4 | 3 |   | 6 | 0 |   | 3 | 0 | 0 | 0             |
|  | (≤7days) |             |       |    |   |   |   |  |   |   |   |   |   |   |   |   |   | 4 | 18            |
|  |          |             |       |    |   |   |   |  |   |   |   |   |   |   |   |   |   |   | after 1 dose) |
|  | 1 dose   |             |       |    |   |   |   |  |   |   |   |   |   |   |   |   |   |   | 21 (≤30days   |
|  |          | medium dose | 13-17 | 84 | 0 | 0 | 4 |  | 1 | 8 | 0 |   | 6 | 1 |   | 0 | 0 | 1 | 0             |
|  | (≤7days) |             |       |    |   |   |   |  |   |   |   |   |   |   |   |   |   | 9 | 12            |
|  |          |             |       |    |   |   |   |  |   |   |   |   |   |   |   |   |   |   | after 1 dose) |
|  | 1 dose   |             |       |    |   |   |   |  |   |   |   |   |   |   |   |   |   |   | 5 (≤30days    |
|  |          | high dose   | 13-17 | 84 | 0 | 0 | 0 |  | 0 | 3 | 0 |   | 1 | 0 |   | 0 | 0 | 0 | 1             |
|  | (≤7days) |             |       |    |   |   |   |  |   |   |   |   |   |   |   |   |   | 4 | 1             |
|  |          |             |       |    |   |   |   |  |   |   |   |   |   |   |   |   |   |   | after 1 dose) |
|  | 2 dose   |             |       |    |   |   |   |  |   |   |   |   |   |   |   |   |   |   | 2 (≤30days    |
|  |          | low dose    | 3-5   | 83 |   |   |   |  |   | 0 |   |   | 0 | 1 |   |   |   | 1 | 1             |
|  | (≤7days) |             |       |    |   |   |   |  |   |   |   |   |   |   |   |   |   |   | after 2 dose) |
|  | 2 dose   |             |       |    |   |   |   |  |   |   |   |   |   |   |   |   |   |   | 7 (≤30days    |
|  |          | medium dose | 3-5   | 83 |   |   |   |  |   | 0 |   |   | 6 | 0 |   | 0 |   | 1 | 6             |
|  | (≤7days) |             |       |    |   |   |   |  |   |   |   |   |   |   |   |   |   |   | after 2 dose) |
|  | 2 dose   |             |       |    |   |   |   |  |   |   |   |   |   |   |   |   |   |   | 6 (≤30days    |
|  |          | high dose   | 3-5   | 83 |   |   |   |  |   | 2 |   |   | 2 | 2 |   | 0 |   | 0 | 4             |
|  | (≤7days) |             |       |    |   |   |   |  |   |   |   |   |   |   |   |   |   |   | after 2 dose) |
|  | 2 dose   |             |       |    |   |   |   |  |   |   |   |   |   |   |   |   |   |   | 5 (≤30days    |
|  |          | low dose    | 6-12  | 84 |   |   |   |  | 0 | 2 |   |   | 1 | 1 |   | 0 | 0 | 0 | 2             |
|  | (≤7days) |             |       |    |   |   |   |  |   |   |   |   |   |   |   |   |   | 3 | after 2 dose) |
|  | 2 dose   |             |       |    |   |   |   |  |   |   |   |   |   |   |   |   |   |   | 9 (≤30days    |
|  |          | medium dose | 6-12  | 83 |   |   |   |  | 0 | 4 |   |   | 0 | 2 |   | 1 | 1 | 1 | 7             |
|  | (≤7days) |             |       |    |   |   |   |  |   |   |   |   |   |   |   |   |   | 2 | after 2 dose) |
|  | 2 dose   |             |       |    |   |   |   |  |   |   |   |   |   |   |   |   |   |   | 9 (≤30days    |
|  |          | high dose   | 6-12  | 83 |   |   |   |  | 0 | 4 |   |   | 3 | 0 |   | 0 | 0 | 2 | 6             |
|  |          |             |       |    |   |   |   |  |   |   |   |   |   |   |   |   |   | 3 | 9 (≤30days    |

|          |             |       |    |   |   |  |   |   |   |   |  |   |   |   |  |   |   |   |               |
|----------|-------------|-------|----|---|---|--|---|---|---|---|--|---|---|---|--|---|---|---|---------------|
| (≤7days) |             |       |    |   |   |  |   |   |   |   |  |   |   |   |  |   |   |   | after 2 dose) |
| 2 dose   |             |       |    |   |   |  |   |   |   |   |  |   |   |   |  |   |   |   | 9 (≤30days    |
|          | low dose    | 13-17 | 84 | 0 | 0 |  |   | 1 | 0 | 1 |  | 3 | 1 | 1 |  | 1 |   | 1 | 8             |
| (≤7days) |             |       |    |   |   |  |   |   |   |   |  |   |   |   |  |   |   |   | after 2 dose) |
| 2 dose   |             |       |    |   |   |  |   |   |   |   |  |   |   |   |  |   |   |   | 7 (≤30days    |
|          | medium dose | 13-17 | 83 | 0 | 0 |  |   | 0 | 4 | 0 |  | 2 | 1 | 0 |  | 0 |   | 0 | 3             |
| (≤7days) |             |       |    |   |   |  |   |   |   |   |  |   |   |   |  |   |   |   | after 2 dose) |
| 2 dose   |             |       |    |   |   |  |   |   |   |   |  |   |   |   |  |   |   |   | 11 (≤30days   |
|          | high dose   | 13-17 | 84 | 2 | 2 |  |   | 0 | 0 | 0 |  | 4 | 1 | 0 |  | 0 |   | 2 | 9             |
| (≤7days) |             |       |    |   |   |  |   |   |   |   |  |   |   |   |  |   |   |   | after 2 dose) |
| 3 dose   |             |       |    |   |   |  |   |   |   |   |  |   |   |   |  |   |   |   | 3 (≤30days    |
|          | low dose    | 3-5   | 82 |   | 0 |  | 0 | 0 | 0 |   |  | 1 | 2 |   |  | 0 |   | 0 | 3             |
| (≤7days) |             |       |    |   |   |  |   |   |   |   |  |   |   |   |  |   |   |   | after 3 dose) |
| 3 dose   |             |       |    |   |   |  |   |   |   |   |  |   |   |   |  |   |   |   | 2 (≤30days    |
|          | medium dose | 3-5   | 83 |   | 0 |  | 1 | 0 | 0 |   |  | 1 | 0 |   |  | 0 |   | 0 | 2             |
| (≤7days) |             |       |    |   |   |  |   |   |   |   |  |   |   |   |  |   |   |   | after 3 dose) |
| 3 dose   |             |       |    |   |   |  |   |   |   |   |  |   |   |   |  |   |   |   | 10 (≤30days   |
|          | high dose   | 3-5   | 83 |   | 1 |  | 0 | 1 | 2 |   |  | 2 | 3 |   |  | 0 |   | 2 | 8             |
| (≤7days) |             |       |    |   |   |  |   |   |   |   |  |   |   |   |  |   |   |   | after 3 dose) |
| 3 dose   |             |       |    |   |   |  |   |   |   |   |  |   |   |   |  |   |   |   | 4 (≤30days    |
|          | low dose    | 6-12  | 83 |   |   |  |   |   | 1 |   |  | 0 | 0 |   |  | 1 | 1 | 1 | 0             |
| (≤7days) |             |       |    |   |   |  |   |   |   |   |  |   |   |   |  |   |   |   | after 3 dose) |
| 3 dose   |             |       |    |   |   |  |   |   |   |   |  |   |   |   |  |   |   |   | 5 (≤30days    |
|          | medium dose | 6-12  | 84 |   |   |  |   |   | 1 |   |  | 0 | 1 |   |  | 0 | 0 | 3 | 1             |
| (≤7days) |             |       |    |   |   |  |   |   |   |   |  |   |   |   |  |   |   |   | after 3 dose) |
| 3 dose   |             |       |    |   |   |  |   |   |   |   |  |   |   |   |  |   |   |   | 2 (≤30days    |
|          | high dose   | 6-12  | 83 |   |   |  |   |   | 0 |   |  | 1 | 0 |   |  | 0 | 0 | 1 | 1             |
| (≤7days) |             |       |    |   |   |  |   |   |   |   |  |   |   |   |  |   |   |   | after 3 dose) |
| 3 dose   |             |       |    |   |   |  |   |   |   |   |  |   |   |   |  |   |   |   | 7 (≤30days    |
|          | low dose    | 13-17 | 84 |   |   |  |   |   | 1 |   |  | 2 | 0 |   |  |   | 1 | 3 | 2             |
| (≤7days) |             |       |    |   |   |  |   |   |   |   |  |   |   |   |  |   |   |   | after 3 dose) |

|                                  |         |                            |               |                                          |                         |             |       |      |   |   |   |   |   |    |   |   |    |   |   |  |   |   |   |  |   |   |                             |                             |   |    |    |    |
|----------------------------------|---------|----------------------------|---------------|------------------------------------------|-------------------------|-------------|-------|------|---|---|---|---|---|----|---|---|----|---|---|--|---|---|---|--|---|---|-----------------------------|-----------------------------|---|----|----|----|
| Fengcai<br><br>Zhu               | 2021.9  | RCT<br><br>Phase<br><br>2b | Chin<br><br>a | d<br><br>COVID<br><br>-19<br><br>vaccine | 3 dose<br><br>(≤7days)  | medium dose | 13-17 | 83   |   |   |   |   |   | 0  |   | 1 | 1  |   |   |  |   | 0 | 0 |  |   | 0 | 2                           | 2 (≤30days<br>after 3 dose) |   |    |    |    |
|                                  |         |                            |               |                                          | 3 dose<br><br>(≤7days)  | high dose   | 13-17 | 84   |   |   |   |   | 0 |    | 1 | 1 |    |   |   |  | 0 | 0 |   |  | 0 | 2 | 2 (≤30days<br>after 3 dose) |                             |   |    |    |    |
|                                  |         |                            |               |                                          |                         |             |       |      |   |   |   |   |   |    |   |   |    |   |   |  |   |   |   |  |   |   |                             |                             |   |    |    |    |
|                                  |         |                            |               |                                          |                         |             |       |      |   |   |   |   |   |    |   |   |    |   |   |  |   |   |   |  |   |   |                             |                             |   |    |    |    |
|                                  |         |                            |               |                                          |                         |             |       |      |   |   |   |   |   |    |   |   |    |   |   |  |   |   |   |  |   |   |                             |                             |   |    |    |    |
|                                  |         |                            |               |                                          |                         |             |       |      |   |   |   |   |   |    |   |   |    |   |   |  |   |   |   |  |   |   |                             |                             |   |    |    |    |
|                                  |         |                            |               |                                          |                         |             |       |      |   |   |   |   |   |    |   |   |    |   |   |  |   |   |   |  |   |   |                             |                             |   |    |    |    |
|                                  |         |                            |               |                                          |                         |             |       |      |   |   |   |   |   |    |   |   |    |   |   |  |   |   |   |  |   |   |                             |                             |   |    |    |    |
|                                  |         |                            |               |                                          |                         |             |       |      |   |   |   |   |   |    |   |   |    |   |   |  |   |   |   |  |   |   |                             |                             |   |    |    |    |
|                                  |         |                            |               |                                          |                         |             |       |      |   |   |   |   |   |    |   |   |    |   |   |  |   |   |   |  |   |   |                             |                             |   |    |    |    |
| Edward<br><br>Wai Wa<br><br>Chan | 2021.12 | cohort<br><br>study        | Chin<br><br>a | BNT16<br><br>2b2                         | 1 dose<br><br>(>14days) |             | 6-17  | 100  |   |   |   |   |   |    |   |   |    |   |   |  |   |   |   |  |   |   |                             | 4                           |   |    |    |    |
|                                  |         |                            |               |                                          | 2 dose<br><br>(≤14days) |             | 6-17  | 100  | 3 | 2 | 1 | 2 | 8 | 14 | 1 | 1 | 13 | 4 | 1 |  | 6 |   | 4 |  | 3 | 0 | 0                           |                             | 1 | 19 | 24 | 33 |
|                                  |         |                            |               |                                          | 2 dose<br><br>(>14days) |             | 6-17  | 100  |   |   |   |   |   |    |   |   |    |   |   |  |   |   |   |  |   |   |                             |                             |   |    | 3  |    |
|                                  |         |                            |               |                                          | 2 dose<br><br>(≤7days)  |             | 12-17 | 1016 |   |   |   |   |   |    |   |   |    |   |   |  |   |   |   |  |   |   |                             |                             |   |    | 72 |    |



Table S4. Results of quality assessment

| Quality assessment of cross-sectional study by AHRQ |                                                          |                                                                                                                                 |                                                    |                                                                           |                                                                                                                         |                                                                                                                        |                                              |                                                         |                                                                      |                                                                      |                                                                                                                                 |              |                  |
|-----------------------------------------------------|----------------------------------------------------------|---------------------------------------------------------------------------------------------------------------------------------|----------------------------------------------------|---------------------------------------------------------------------------|-------------------------------------------------------------------------------------------------------------------------|------------------------------------------------------------------------------------------------------------------------|----------------------------------------------|---------------------------------------------------------|----------------------------------------------------------------------|----------------------------------------------------------------------|---------------------------------------------------------------------------------------------------------------------------------|--------------|------------------|
| First author                                        | Define the source of information (survey, record review) | List inclusion and exclusion criteria for exposed and unexposed subjects (cases and controls) or refer to previous publications | Indicate time period used for identifying patients | Indicate whether or not subjects were consecutive if not population-based | Indicate if evaluators of subjective components of study were masked to other aspects of the status of the participants | Describe any assessments undertaken for quality assurance purposes (e.g., test/retest of primary outcome measurements) | Explain any patient exclusions from analysis | Describe how confounding was assessed and/or controlled | If applicable, explain how missing data were handled in the analysis | Summarize patient response rates and completeness of data collection | Clarify what follow-up, if any, was expected and the percentage of patients for which incomplete data or follow-up was obtained | Total score  | Risk of bias     |
|                                                     |                                                          |                                                                                                                                 |                                                    |                                                                           |                                                                                                                         |                                                                                                                        |                                              |                                                         |                                                                      |                                                                      |                                                                                                                                 |              |                  |
| Anne M. Hause                                       | 1                                                        | 1                                                                                                                               | 1                                                  | 1                                                                         | 1                                                                                                                       | 0                                                                                                                      | 1                                            | 0                                                       | 1                                                                    | 0                                                                    | 1                                                                                                                               | 8            | Low risk of bias |
| Edrous Alamer                                       | 1                                                        | 1                                                                                                                               | 1                                                  | 0                                                                         | 1                                                                                                                       | 1                                                                                                                      | 1                                            | 0                                                       | 1                                                                    | 1                                                                    | 1                                                                                                                               | 9            | Low risk of bias |
| Anne M. Hause                                       | 1                                                        | 1                                                                                                                               | 1                                                  | 1                                                                         | 1                                                                                                                       | 0                                                                                                                      | 1                                            | 0                                                       | 1                                                                    | 1                                                                    | 1                                                                                                                               | 9            | Low risk of bias |
| Allison L. Naleway                                  | 1                                                        | 1                                                                                                                               | 1                                                  | 1                                                                         | 1                                                                                                                       | 1                                                                                                                      | 1                                            | 1                                                       | 1                                                                    | 1                                                                    | 1                                                                                                                               | 11           | Low risk of bias |
| Quality assessment of cohort study by NOS           |                                                          |                                                                                                                                 |                                                    |                                                                           |                                                                                                                         |                                                                                                                        |                                              |                                                         |                                                                      |                                                                      |                                                                                                                                 |              |                  |
| First author                                        | Selection                                                |                                                                                                                                 |                                                    | Comparability                                                             |                                                                                                                         |                                                                                                                        |                                              | Outcome                                                 |                                                                      |                                                                      | Total score                                                                                                                     | Risk of bias |                  |
|                                                     | Representativeness of the exposed cohort                 | Selection of the non exposed cohort                                                                                             | Ascertainment of exposure                          | Demonstration that interest was not present at start of study             | Comparability of cohorts on the basis of the design or analysis                                                         |                                                                                                                        | Assessment of outcome                        | Was follow-up long enough for outcomes to occur         |                                                                      | Adequacy of follow up of cohorts                                     |                                                                                                                                 |              |                  |
|                                                     |                                                          |                                                                                                                                 |                                                    |                                                                           |                                                                                                                         |                                                                                                                        |                                              |                                                         |                                                                      |                                                                      |                                                                                                                                 |              |                  |
| Sara Y Tartof                                       | 1                                                        | 1                                                                                                                               | 1                                                  | 0                                                                         | 1                                                                                                                       |                                                                                                                        | 1                                            | 1                                                       |                                                                      | 1                                                                    | 1                                                                                                                               | 7            | Low risk of bias |

|                    |   |   |   |   |   |   |   |   |   |                       |
|--------------------|---|---|---|---|---|---|---|---|---|-----------------------|
| Edward Wai Wa Chan | 0 | 1 | 1 | 1 | 2 | 0 | 1 | 0 | 6 | Moderate risk of bias |
| Karen Lutrick      | 1 | 1 | 1 | 1 | 1 | 1 | 1 | 1 | 8 | Low risk of bias      |

| Quality assessment of RCTs by the Cochrane Risk of Bias tool |                            |                        |                                |                                |                |                |                        |            |                  |
|--------------------------------------------------------------|----------------------------|------------------------|--------------------------------|--------------------------------|----------------|----------------|------------------------|------------|------------------|
| First author                                                 | Selection                  |                        | Performance bias               |                                | Dectetion bias | Attrition bias | Reporting bias         | Other bias | Risk of bias     |
|                                                              | Random sequence generation | Allocation concealment | Blinding of outcome assessment | Blinding of outcome assessment | Incomplete     | Selective      | Anything else, ideally |            |                  |
|                                                              |                            |                        |                                |                                | outcome data   | reporting      | prespecified           |            |                  |
| Kashif Ali                                                   | Low                        | Low                    | Low                            | Low                            | Low            | Low            | Low                    | Low        | Low risk of bias |
| Robert W. Frenck, Jr.                                        | Low                        | Low                    | Low                            | Low                            | Low            | Low            | Low                    | Low        | Low risk of bias |
| Bihua Han                                                    | Low                        | Low                    | Low                            | Low                            | Low            | Low            | Low                    | Low        | Low risk of bias |
| E.B. Walter                                                  | Low                        | Low                    | Low                            | Low                            | Low            | Low            | Low                    | Low        | Low risk of bias |
| ShengLi Xia                                                  | Low                        | Low                    | Low                            | Low                            | Low            | Low            | Low                    | Low        | Low risk of bias |
| S.J. Thomas                                                  | Low                        | Low                    | Low                            | Low                            | Low            | Low            | Low                    | Low        | Low risk of bias |

Table S5. Incidence rates of adverse events after each dose of BNT162b2

| Adverse events           | The first dose |                                |                    | The second dose |                                |                    |
|--------------------------|----------------|--------------------------------|--------------------|-----------------|--------------------------------|--------------------|
|                          | NO.<br>cohorts | Incidence rate of              |                    | NO.<br>cohorts  | Incidence rate of              |                    |
|                          |                | adverse events (%)<br>(95% CI) | I <sup>2</sup> (%) |                 | adverse events (%)<br>(95% CI) | I <sup>2</sup> (%) |
| Nausea                   | 3              | 7.6 (4.7-10.4)                 | 99.8               | 3               | 13.8 (6.2-21.4)                | 99.9               |
| Vomiting                 | 8              | 2.2 (1.4-3.1)                  | 98.4               | 8               | 3.6 (2.5-4.9)                  | 97.8               |
| Diarrhoea                | 7              | 4.3 (3.4-5.50)                 | 98.1               | 7               | 4.5 (3.3-6.3)                  | 98.5               |
| Headache                 | 8              | 26.8 (20.9-33.7)               | 99.8               | 10              | 42.4 (31.8-53.7)               | 99.9               |
| Injection site pain      | 10             | 60.5 (56.0-64.8)               | 99.5               | 9               | 62.7 (59.6-65.7)               | 98.3               |
| Myalgia/Muscle pain      | 7              | 16.1 (10.7-23.4)               | 99.9               | 8               | 22.1 (13.7-33.6)               | 99.9               |
| Arthralgia/Joint pain    | 9              | 5.7 (3.8-8.5)                  | 99.5               | 6               | 9.5 (5.4-16.0)                 | 99.8               |
| Fever                    | 9              | 8.6 (7.6-9.7)                  | 96.4               | 8               | 19.7 (14.2-26.5)               | 99.8               |
| Chills                   | 9              | 9.2 (6.6-12.4)                 | 99.4               | 10              | 23.5 (16.4-32.4)               | 99.8               |
| Fatigue                  | 9              | 34.3 (28.4-40.7)               | 99.7               | 9               | 49.5 (39.9-59.2)               | 99.8               |
| Rash                     | 3              | 1.2 (1.1-1.3)                  | 0.0                |                 |                                |                    |
| Swelling                 | 9              | 7.2 (5.7-9.3)                  | 98.9               | 8               | 9.0 (6.9-11.6)                 | 98.9               |
| Itching                  | 3              | 5.1 (3.8-6.4)                  | 99.3               | 3               | 5.2 (3.6-6.7)                  | 99.3               |
| Redness                  | 7              | 5.3 (4.3-6.5)                  | 97.9               | 9               | 7.3 (5.8-9.2)                  | 97.4               |
| Abdominal pain           | 3              | 4.6 (4.1-5.2)                  | 96.8               | 3               | 7.3 (6.1-8.5)                  | 98.4               |
| Any local adverse events | 3              | 60.5 (55.4-65.6)               | 99.8               | 3               | 61.4 (57.6-65.3)               | 99.4               |
| Any systemic adverse     | 3              | 46.4 (34.8-58.1)               | 100.0              | 3               | 58.1 (41.8-74.4)               | 100.0              |

---

|                    |   |                  |      |   |                   |      |
|--------------------|---|------------------|------|---|-------------------|------|
| events             |   |                  |      |   |                   |      |
| Any adverse events | 2 | 17.9 (-7.6-43.3) | 99.6 | 2 | 35.5 (-20.3-91.4) | 99.8 |

---
